# Supplementary material
Source: PubMed Central journal article supplement (PMC4267677)
Supplement: NIHMS646212-supplement-1.pdf [file NIHMS646212-supplement-1.pdf]

Table S1. Characteristics of Published GWA studies for Type 2 Diabetes

| Characteristic          | McGill/<br>Imperial College                         | Decode                                      | WTCCC                              | Fusion                                    | DGI                                                |
|-------------------------|-----------------------------------------------------|---------------------------------------------|------------------------------------|-------------------------------------------|----------------------------------------------------|
| <u>Screening set</u>    |                                                     |                                             |                                    |                                           |                                                    |
| Race                    | White                                               | White                                       | White                              | White                                     | White                                              |
| Ethnicity               | French                                              | Icelandic                                   | British/Irish                      | Finnish                                   | Scandinavian                                       |
| N (cases/controls)      | 661/614                                             | 1,399/5,275                                 | 1,999/3,004                        | 1,161/1,174                               | 1,464/1,467                                        |
| Cases                   |                                                     |                                             |                                    |                                           |                                                    |
| Selection Criteria      | Unrelated T2D<br>BMI <30<br>Positive family history | Unrelated T2D                               | Unrelated T2D<br>Age at dx 25-75 y | Unrelated T2D                             | Unrelated T2D<br>Age at dx >35 y                   |
| Age at dx               | 45.0 (8.4) <sup>†</sup>                             | 56.2 (12.3) <sup>†</sup>                    | 50.3 (9.2) <sup>†</sup>            | 53.0 (12.0) <sup>¶</sup>                  | 57.1 (10.0) <sup>†</sup>                           |
| BMI                     | 25.8 (2.8) <sup>†</sup>                             | 29.8 (5.4) <sup>†</sup>                     | 30.7 (25.4, 37.1) <sup>‡</sup>     | 29.8 (6.1) <sup>¶</sup>                   | 28.5 (4.4) <sup>†</sup>                            |
| Controls                |                                                     |                                             |                                    |                                           |                                                    |
| Selection Criteria      | NGT<br>Unmatched                                    | Undetermined GT<br>Unmatched                | Undetermined GT<br>Unmatched       | NGT<br>Age-, sex-, and origin-<br>matched | NGT<br>Age-, sex-, BMI-,<br>and origin-<br>matched |
| Age at examination      | 53.4 (5.6) <sup>†</sup>                             | 58.3 (17.4) <sup>†</sup>                    | NA                                 | 64.0 (11.7) <sup>¶</sup>                  | 58.8 (10.0) <sup>†</sup>                           |
| BMI                     | 23.2 (1.8) <sup>†</sup>                             | 27.1 (4.9) <sup>†</sup>                     | NA                                 | 26.8 (5.0) <sup>¶</sup>                   | 27.3 (3.9) <sup>†</sup>                            |
| <u>Replication sets</u> |                                                     |                                             |                                    |                                           |                                                    |
| Race                    | White                                               | White/Chinese/Africans                      | White                              | White                                     | White                                              |
| Ethnicity               | French                                              | Danish/Dutch/US/Hong<br>Kong/ West Africans | British/Irish                      | Finnish                                   | Scandinavian?US/<br>Polish                         |
| N (cases/controls)      | 2,617/2,894                                         | 4,759/9,379 <sup>*</sup>                    | 3,757/3,771                        | 1,215/1258                                | 5,065/5,785                                        |
| Age at Dx of cases      | 50.4 (11.0) <sup>†</sup>                            | NA                                          | 54.3 (9.0)                         | 56.0 (12.0) <sup>¶</sup>                  | NA                                                 |
| BMI of cases            | 28.9 (3.6) <sup>†</sup>                             | 27.6 (4.9) <sup>†</sup>                     | 31.1 (25.6, 38.0)                  | 30.1 (6.7) <sup>¶</sup>                   | 30.4 (5.7)                                         |
| <u>Platform</u>         | Illumina 100K/300K                                  | Illumina 300K                               | Affymetrix 500K                    | Illumina 300K                             | Affymetrix 500K                                    |

| Characteristic          | DiaGen                           | Framingham                           | Starr County                                                   | Old Order Amish                  | NIH Phoenix                      |
|-------------------------|----------------------------------|--------------------------------------|----------------------------------------------------------------|----------------------------------|----------------------------------|
| <u>Screening set</u>    |                                  |                                      |                                                                |                                  |                                  |
| Race                    | White                            | White                                | White                                                          | White                            | Native-Americans                 |
| Ethnicity               | Finnish/Ashkenazi/German/British | US                                   | Mexican-American                                               | US Amish                         | Pima                             |
| N (cases/controls)      | 500/497                          | 91/996                               | 281/280                                                        | 124/295                          | 300/334                          |
| Cases                   |                                  |                                      |                                                                |                                  |                                  |
| Selection Criteria      | Unrelated T2D                    | Incident T2D cases from 307 families | Unrelated T2D<br>Youngest age at onset from multiplex families | Unrelated T2D<br>Age at dx >35 y | Unrelated T2D<br>Age at dx <25 y |
| Age at dx               | NA                               | NA                                   | 45.8 (10.1) <sup>†</sup>                                       | NA                               | 19.2 (4.5) <sup>†</sup>          |
| BMI                     | NA                               | NA                                   | 31.5 (6.2) <sup>†</sup>                                        | 29.3 (5.8) <sup>†</sup>          | 38.9 (8.4) <sup>†</sup>          |
| Controls                |                                  |                                      |                                                                |                                  |                                  |
| Selection Criteria      | NGT<br>Sex-matched               | NGT<br>Cohort based                  | Undetermined GT<br>Unmatched                                   | NGT<br>Unmatched                 | NGT<br>Age >45 y                 |
| Age at examination      | NA                               | 59 (9.8) <sup>†</sup>                | NA                                                             | 64.4 (12.9) <sup>†</sup>         | 55.5 (9.8) <sup>†</sup>          |
| BMI                     | NA                               | NA                                   | NA                                                             | 27.4 (4.7) <sup>†</sup>          | 35.4 (8.0) <sup>†</sup>          |
| <u>Replication sets</u> |                                  |                                      |                                                                |                                  |                                  |
| Race                    | White                            | White                                | White                                                          | White                            | Native-Americans                 |
| Ethnicity               | French                           | US                                   | Mexican-American                                               | US Amish                         | Pima                             |
| N (cases/controls)      | 2,573/2,776                      | 150/1240                             | 411//349 <sup>#</sup>                                          | 427 <sup>§</sup>                 | 1,200/1,627                      |
| Age at Dx of cases      | NA                               | NA                                   | 46.0 (10.2) <sup>†</sup>                                       | NA                               | 39.7 (10.6) <sup>†</sup>         |
| BMI of cases            | NA                               | NA                                   | 31.6 (6.3) <sup>†</sup>                                        | NA                               | 38.3 (8.2) <sup>†</sup>          |
| <u>Platform</u>         | Illumina 300K                    | Affymetrix 100K                      | Affymetrix 100K                                                | Affymetrix 100K                  | Affymetrix 100K                  |

T2D = type 2 diabetes diagnosed according to the WHO or ADA criteria, NGT = Normal Glucose Tolerance, NA = not available

<sup>†</sup>Mean (SD), <sup>‡</sup>Geometric Mean (Range), <sup>¶</sup>Median (IQR); \*2,437/7,287 White, 1,457/986 Chinese, 865/1,106 Africans.

<sup>#</sup>Include 555 of the 561 individuals in the screening set. <sup>§</sup>Normoglycemic subjects investigated for association with quantitative traits.
